# Supplementary material
Source: PubMed Central journal article supplement (PMC11110262)
Supplement: NIHMS1695955-supplement-Supplem2entary_Figure.pdf [file NIHMS1695955-supplement-Supplem2entary_Figure.pdf]

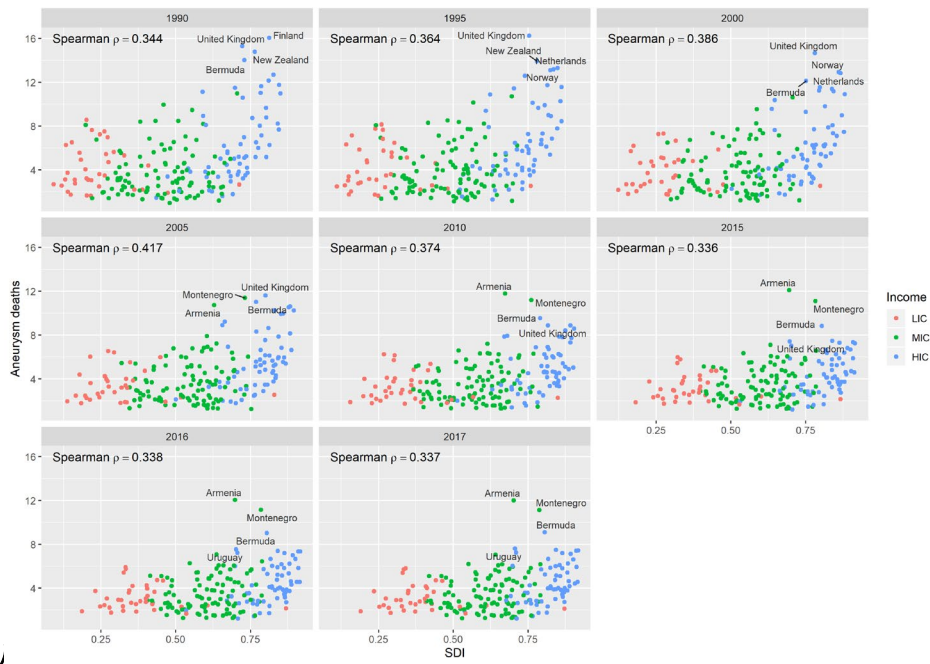

A)

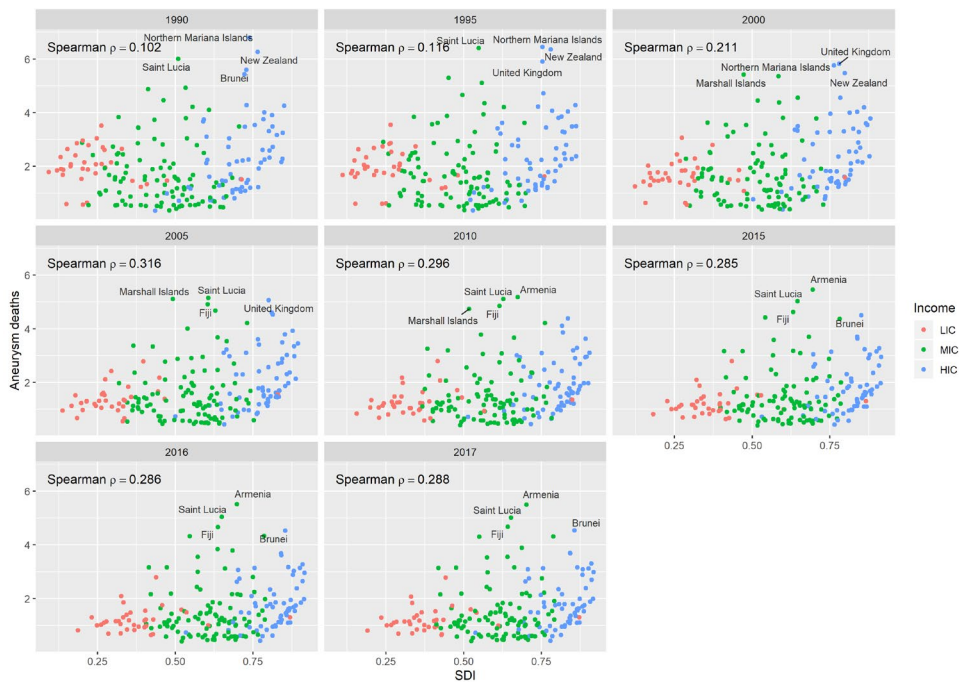

LIC: Low income countries; MIC: Middle-income countries; HIC: High-income countries. Statistical significances are not shown

**Supplementary Figure 2.** Correlation between age-standardized aortic aneurysm mortality and sociodemographic index (SDI) among 195 countries, analyzed by country's income, for males(A) and females (B), between 1990 to 2017.
