# Supplementary material
Source: PubMed Central journal article supplement (PMC11110262)
Supplement: NIHMS1695955-supplement-Supplementary_Figure_1.pdf [file NIHMS1695955-supplement-Supplementary_Figure_1.pdf]

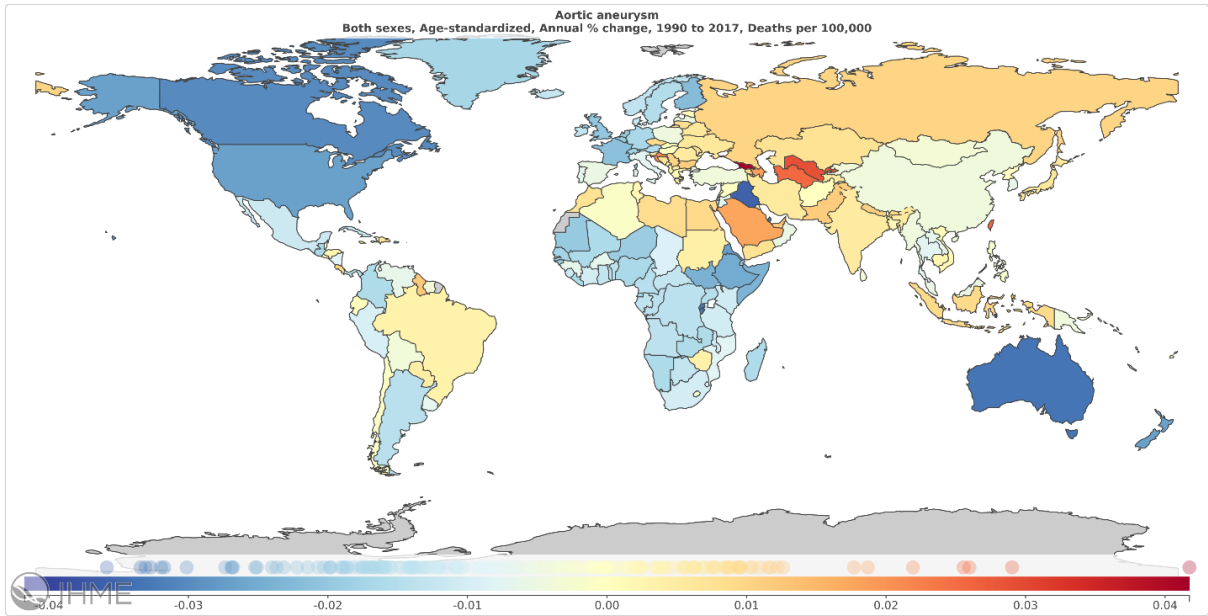

**Supplementary Figure 1:** Map of aortic aneurysm age-standardized ARC% mortality estimates, for both sexes, between 1990 and 2017
