# Supplementary material
Source: PubMed Central journal article supplement (PMC11110262)
Supplement: NIHMS1695955-supplement-Supplementary_Figure_3.pdf [file NIHMS1695955-supplement-Supplementary_Figure_3.pdf]

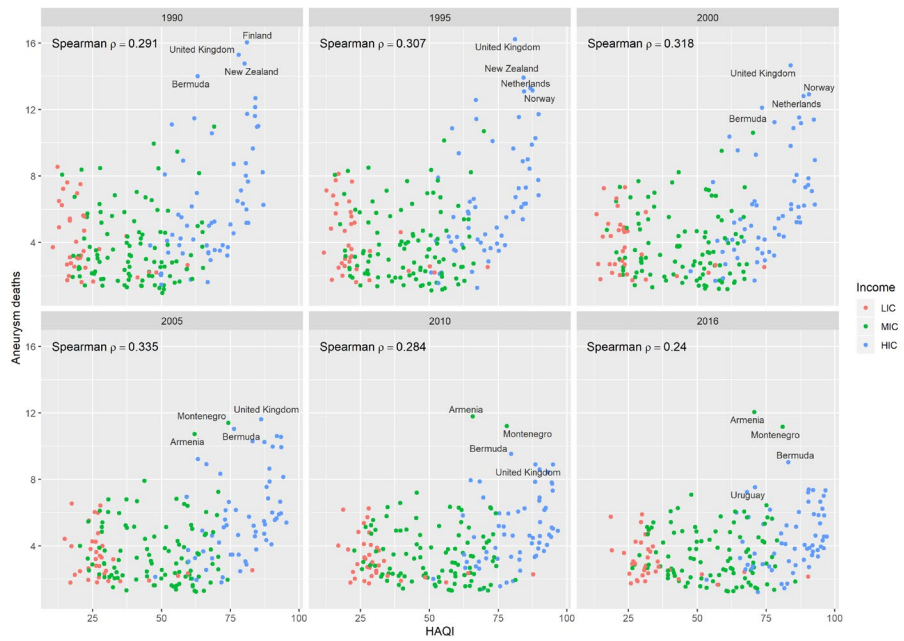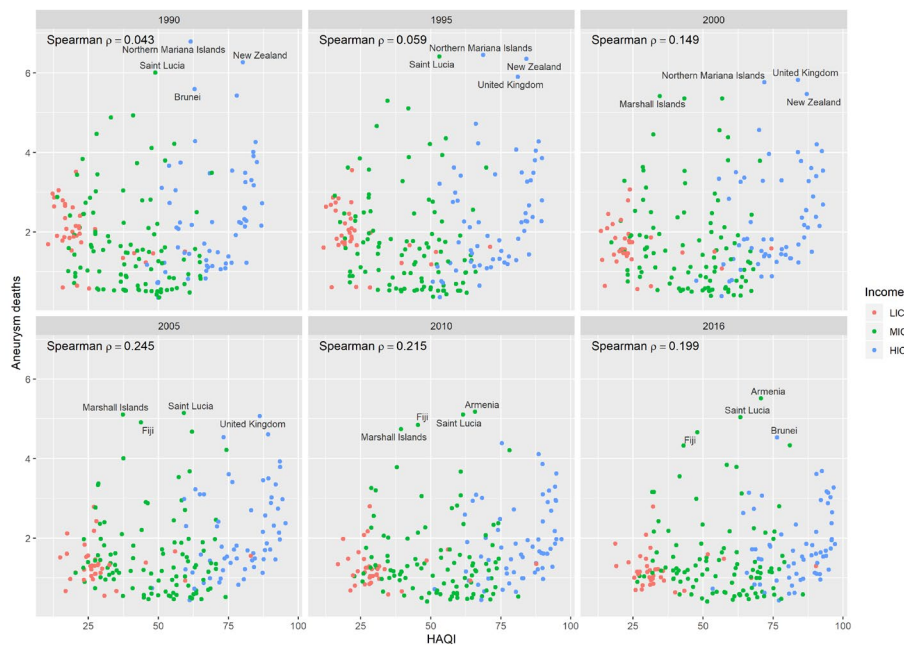

Aortic aneurysm deaths are expressed as age-standardized deaths per 100,000

LIC: Low income countries; MIC: Middle-income countries; HIC: High-income countries. Statistical significances are not shown

**Supplementary Figure 3.** Correlation between age-standardized aortic aneurysm mortality and healthcare access and quality (HAQ) index among 195 countries, analyzed by country's income, for males (A) and females (B), between 1990 to 2016.
