# Supplementary material
Source: PubMed Central journal article supplement (PMC11110262)
Supplement: NIHMS1695955-supplement-Supplementary_Table_1.pdf [file NIHMS1695955-supplement-Supplementary_Table_1.pdf]

Table 1. Aortic aneurism age-standardized mortality estimates and ARC% expressed by country, for both sexes in 1990, and 2017

| Location                         | 1990                              |        |       | 2017                              |        |       | ARC %  |
|----------------------------------|-----------------------------------|--------|-------|-----------------------------------|--------|-------|--------|
|                                  | Rate of death per 100,000 in 1990 | 95% UI |       | Rate of death per 100,000 in 2017 | 95% UI |       |        |
| Mozambique                       | 3.942                             | 2.325  | 5.581 | 3.192                             | 2.262  | 4.379 | -0.78% |
| Mauritius                        | 1.591                             | 1.469  | 1.721 | 1.087                             | 0.991  | 1.189 | -1.41% |
| Malawi                           | 2.727                             | 1.523  | 3.916 | 2.031                             | 1.326  | 2.818 | -1.09% |
| Rwanda                           | 3.957                             | 2.552  | 5.815 | 1.620                             | 1.099  | 2.431 | -3.31% |
| Somalia                          | 4.565                             | 2.706  | 7.118 | 2.409                             | 1.595  | 3.372 | -2.37% |
| Zambia                           | 3.276                             | 2.149  | 4.414 | 2.134                             | 1.520  | 2.731 | -1.59% |
| Kenya                            | 2.672                             | 1.889  | 3.497 | 1.992                             | 1.544  | 2.613 | -1.09% |
| Madagascar                       | 5.626                             | 3.598  | 7.864 | 3.643                             | 2.457  | 4.972 | -1.61% |
| South Sudan                      | 4.116                             | 2.491  | 6.402 | 2.152                             | 1.394  | 3.134 | -2.40% |
| Tanzania                         | 3.310                             | 2.168  | 4.441 | 2.495                             | 1.752  | 3.551 | -1.05% |
| Uganda                           | 2.572                             | 1.631  | 3.801 | 1.720                             | 1.140  | 2.545 | -1.49% |
| Zimbabwe                         | 2.645                             | 2.125  | 3.084 | 2.919                             | 2.183  | 3.636 | 0.37%  |
| Ethiopia                         | 2.656                             | 1.701  | 4.244 | 1.344                             | 0.911  | 1.907 | -2.52% |
| Eritrea                          | 5.172                             | 3.448  | 8.046 | 2.470                             | 1.624  | 3.345 | -2.74% |
| Djibouti                         | 4.054                             | 2.575  | 5.771 | 2.429                             | 1.585  | 3.389 | -1.90% |
| Comoros                          | 4.743                             | 3.139  | 6.766 | 2.292                             | 1.619  | 3.015 | -2.69% |
| Burundi                          | 4.805                             | 3.379  | 6.693 | 1.987                             | 1.373  | 2.775 | -3.27% |
| Gabon                            | 5.288                             | 3.930  | 6.722 | 3.672                             | 2.764  | 4.445 | -1.35% |
| Equatorial Guinea                | 5.148                             | 3.226  | 8.182 | 3.207                             | 2.267  | 4.367 | -1.75% |
| Chad                             | 2.183                             | 1.583  | 2.814 | 1.707                             | 1.267  | 2.261 | -0.91% |
| Sao Tome and Principe            | 1.923                             | 1.308  | 2.761 | 1.779                             | 1.402  | 2.274 | -0.29% |
| Congo                            | 5.567                             | 4.149  | 7.826 | 3.808                             | 2.897  | 4.703 | -1.41% |
| Democratic Republic of the Congo | 3.843                             | 2.532  | 5.377 | 2.621                             | 1.926  | 3.414 | -1.42% |
| Cameroon                         | 2.709                             | 2.087  | 3.461 | 1.824                             | 1.410  | 2.353 | -1.47% |
| Central African Republic         | 5.050                             | 3.059  | 7.757 | 3.565                             | 2.360  | 5.237 | -1.29% |
| Angola                           | 4.575                             | 3.082  | 6.915 | 3.145                             | 2.473  | 3.983 | -1.39% |
| Morocco                          | 0.928                             | 0.644  | 1.390 | 1.134                             | 0.836  | 1.578 | 0.74%  |
| Libya                            | 0.844                             | 0.626  | 1.228 | 1.068                             | 0.801  | 1.473 | 0.87%  |
| Tunisia                          | 0.983                             | 0.741  | 1.475 | 1.042                             | 0.744  | 1.465 | 0.22%  |
| Algeria                          | 0.963                             | 0.683  | 1.350 | 0.935                             | 0.677  | 1.274 | -0.11% |
| Namibia                          | 3.788                             | 2.904  | 4.624 | 2.447                             | 1.982  | 2.941 | -1.62% |
| Swaziland                        | 3.320                             | 2.662  | 4.020 | 2.629                             | 2.058  | 3.247 | -0.86% |
| Lesotho                          | 2.637                             | 2.053  | 3.368 | 2.505                             | 1.890  | 3.150 | -0.19% |
| South Africa                     | 3.105                             | 2.407  | 3.752 | 2.354                             | 2.138  | 2.809 | -1.03% |
| Botswana                         | 3.337                             | 2.666  | 4.044 | 2.350                             | 1.871  | 2.967 | -1.30% |

|                                  |       |       |       |       |       |       |        |
|----------------------------------|-------|-------|-------|-------|-------|-------|--------|
| Togo                             | 2.750 | 2.084 | 3.549 | 1.892 | 1.509 | 2.367 | -1.39% |
| Sierra Leone                     | 2.583 | 1.875 | 3.327 | 1.902 | 1.520 | 2.384 | -1.13% |
| Senegal                          | 2.108 | 1.577 | 2.713 | 1.312 | 1.057 | 1.636 | -1.76% |
| Nigeria                          | 2.395 | 1.706 | 3.238 | 1.531 | 1.062 | 2.332 | -1.66% |
| Niger                            | 2.223 | 1.626 | 2.965 | 1.328 | 0.932 | 1.826 | -1.91% |
| Mauritania                       | 3.184 | 2.555 | 4.285 | 1.866 | 1.462 | 2.407 | -1.98% |
| Mali                             | 2.725 | 1.769 | 3.874 | 1.760 | 1.248 | 2.375 | -1.62% |
| Liberia                          | 2.654 | 1.780 | 3.443 | 1.704 | 1.218 | 2.228 | -1.64% |
| Guinea-Bissau                    | 3.887 | 2.675 | 5.523 | 2.337 | 1.630 | 3.230 | -1.88% |
| The Gambia                       | 2.820 | 2.027 | 3.688 | 2.022 | 1.581 | 2.517 | -1.23% |
| Guinea                           | 2.419 | 1.849 | 3.292 | 2.026 | 1.483 | 2.740 | -0.66% |
| Ghana                            | 2.493 | 2.030 | 2.938 | 1.746 | 1.449 | 2.110 | -1.32% |
| Cape Verde                       | 1.022 | 0.813 | 1.248 | 1.290 | 1.084 | 1.497 | 0.86%  |
| Cote d'Ivoire                    | 2.589 | 1.891 | 3.242 | 1.955 | 1.558 | 2.423 | -1.04% |
| Burkina Faso                     | 1.926 | 1.368 | 2.564 | 1.619 | 1.211 | 2.145 | -0.64% |
| Benin                            | 2.445 | 1.851 | 3.205 | 1.686 | 1.239 | 2.276 | -1.38% |
| Dominica                         | 4.648 | 4.067 | 5.229 | 4.369 | 3.940 | 4.813 | -0.23% |
| Dominican Republic               | 1.702 | 1.438 | 1.966 | 2.017 | 1.687 | 2.485 | 0.63%  |
| Antigua and Barbuda              | 2.701 | 2.428 | 2.991 | 2.018 | 1.827 | 2.239 | -1.08% |
| Cuba                             | 5.259 | 4.747 | 5.925 | 3.821 | 3.390 | 4.319 | -1.18% |
| Grenada                          | 5.615 | 4.852 | 6.441 | 4.624 | 4.214 | 5.039 | -0.72% |
| Jamaica                          | 1.989 | 1.789 | 2.327 | 2.402 | 1.993 | 2.825 | 0.70%  |
| Trinidad and Tobago              | 5.348 | 4.875 | 5.941 | 4.184 | 3.518 | 4.991 | -0.91% |
| Saint Lucia                      | 7.046 | 6.079 | 8.377 | 5.272 | 4.771 | 5.775 | -1.07% |
| Saint Vincent and the Grenadines | 3.238 | 2.972 | 3.521 | 2.852 | 2.589 | 3.129 | -0.47% |
| Haiti                            | 3.945 | 2.680 | 5.453 | 3.692 | 2.969 | 4.752 | -0.25% |
| El Salvador                      | 1.232 | 1.061 | 1.410 | 1.299 | 1.072 | 1.537 | 0.20%  |
| Nicaragua                        | 1.072 | 0.898 | 1.231 | 0.862 | 0.752 | 1.005 | -0.81% |
| Mexico                           | 1.307 | 1.271 | 1.350 | 0.957 | 0.911 | 0.998 | -1.16% |
| Honduras                         | 1.167 | 0.874 | 1.531 | 1.246 | 0.952 | 1.657 | 0.24%  |
| Guatemala                        | 1.765 | 1.496 | 2.015 | 1.120 | 0.998 | 1.254 | -1.68% |
| Costa Rica                       | 2.024 | 1.762 | 2.339 | 2.617 | 2.358 | 2.921 | 0.95%  |
| Belize                           | 1.725 | 1.530 | 2.044 | 1.683 | 1.487 | 1.840 | -0.09% |
| Colombia                         | 3.855 | 3.678 | 4.059 | 2.511 | 2.191 | 2.849 | -1.59% |
| Guyana                           | 2.302 | 2.086 | 2.522 | 3.202 | 2.820 | 3.596 | 1.22%  |
| Ecuador                          | 1.964 | 1.714 | 2.209 | 1.971 | 1.780 | 2.206 | 0.01%  |
| Paraguay                         | 2.743 | 2.350 | 3.116 | 3.116 | 2.570 | 3.784 | 0.47%  |
| Suriname                         | 2.718 | 2.341 | 3.082 | 2.476 | 2.168 | 2.799 | -0.35% |
| Venezuela                        | 2.724 | 2.457 | 3.036 | 2.297 | 1.971 | 2.668 | -0.63% |
| Peru                             | 1.389 | 1.189 | 1.683 | 1.070 | 0.886 | 1.272 | -0.97% |

|                    |       |       |       |       |       |       |        |
|--------------------|-------|-------|-------|-------|-------|-------|--------|
| Brazil             | 4.091 | 4.001 | 4.189 | 4.494 | 4.285 | 4.667 | 0.35%  |
| Bolivia            | 2.487 | 1.495 | 3.462 | 2.248 | 1.709 | 2.913 | -0.37% |
| Argentina          | 6.835 | 6.205 | 7.667 | 4.645 | 4.178 | 5.193 | -1.43% |
| Turkmenistan       | 1.183 | 1.011 | 1.399 | 2.359 | 1.910 | 2.941 | 2.56%  |
| Uzbekistan         | 0.592 | 0.435 | 0.743 | 1.296 | 1.152 | 1.457 | 2.90%  |
| Tajikistan         | 1.629 | 1.327 | 2.010 | 1.894 | 1.534 | 2.143 | 0.56%  |
| Kyrgyzstan         | 0.863 | 0.772 | 1.017 | 0.777 | 0.702 | 0.869 | -0.39% |
| Kazakhstan         | 1.569 | 1.321 | 1.893 | 1.928 | 1.774 | 2.091 | 0.76%  |
| Mongolia           | 1.020 | 0.883 | 1.284 | 0.939 | 0.815 | 1.091 | -0.31% |
| North Korea        | 1.173 | 0.942 | 1.454 | 1.167 | 0.945 | 1.476 | -0.02% |
| Myanmar            | 1.460 | 1.012 | 2.080 | 1.294 | 1.043 | 1.603 | -0.45% |
| Cambodia           | 1.360 | 0.869 | 2.154 | 1.453 | 1.193 | 1.845 | 0.24%  |
| Vietnam            | 1.448 | 1.126 | 1.944 | 1.505 | 1.256 | 1.845 | 0.14%  |
| Laos               | 2.313 | 1.652 | 3.572 | 1.944 | 1.549 | 2.575 | -0.64% |
| Malaysia           | 4.612 | 3.651 | 5.330 | 3.967 | 3.244 | 4.549 | -0.56% |
| Thailand           | 2.178 | 1.735 | 2.632 | 1.771 | 1.475 | 1.976 | -0.77% |
| Philippines        | 2.285 | 2.006 | 2.626 | 2.155 | 1.890 | 2.444 | -0.22% |
| Indonesia          | 1.372 | 1.095 | 1.730 | 1.764 | 1.437 | 2.270 | 0.93%  |
| Timor-Leste        | 1.253 | 0.881 | 1.752 | 1.507 | 1.127 | 2.349 | 0.69%  |
| Maldives           | 3.624 | 2.486 | 4.910 | 2.194 | 1.883 | 2.518 | -1.86% |
| Nepal              | 1.134 | 0.819 | 1.706 | 1.525 | 1.193 | 1.952 | 1.10%  |
| Iran               | 0.830 | 0.702 | 1.009 | 0.965 | 0.803 | 1.049 | 0.56%  |
| Sri Lanka          | 1.931 | 1.673 | 2.267 | 1.755 | 1.361 | 2.199 | -0.35% |
| Bhutan             | 1.953 | 1.424 | 2.688 | 2.526 | 1.917 | 3.355 | 0.95%  |
| Bangladesh         | 1.511 | 1.085 | 2.178 | 1.595 | 1.252 | 2.060 | 0.20%  |
| Afghanistan        | 1.232 | 0.629 | 2.604 | 1.222 | 0.787 | 2.061 | -0.03% |
| Palestine          | 1.795 | 1.388 | 2.395 | 1.600 | 1.386 | 1.833 | -0.43% |
| Lebanon            | 1.150 | 0.894 | 1.797 | 1.117 | 0.879 | 1.506 | -0.11% |
| Turkey             | 2.799 | 2.061 | 3.982 | 2.506 | 2.186 | 3.153 | -0.41% |
| Yemen              | 1.071 | 0.617 | 2.067 | 1.324 | 0.910 | 1.923 | 0.79%  |
| Iraq               | 3.849 | 3.147 | 4.655 | 1.462 | 1.283 | 1.628 | -3.59% |
| Jordan             | 2.039 | 1.439 | 2.735 | 1.702 | 1.419 | 2.190 | -0.67% |
| Syria              | 1.730 | 1.337 | 2.433 | 1.697 | 1.409 | 2.058 | -0.07% |
| Georgia            | 0.961 | 0.868 | 1.078 | 2.967 | 2.706 | 3.276 | 4.17%  |
| Azerbaijan         | 1.221 | 0.930 | 1.713 | 2.022 | 1.653 | 2.356 | 1.87%  |
| Armenia            | 6.376 | 5.511 | 7.385 | 8.263 | 7.706 | 8.867 | 0.96%  |
| Moldova            | 1.007 | 0.927 | 1.111 | 1.264 | 1.169 | 1.361 | 0.84%  |
| Romania            | 1.794 | 1.618 | 1.991 | 2.084 | 1.945 | 2.222 | 0.56%  |
| Ukraine            | 2.157 | 1.966 | 2.444 | 2.556 | 2.382 | 2.734 | 0.63%  |
| Belarus            | 2.102 | 1.721 | 2.423 | 2.482 | 2.237 | 2.755 | 0.62%  |
| Russian Federation | 2.648 | 2.506 | 2.770 | 3.492 | 3.377 | 3.611 | 1.02%  |
| Bulgaria           | 1.573 | 1.460 | 1.669 | 2.149 | 1.979 | 2.324 | 1.16%  |
| Macedonia          | 1.485 | 1.285 | 2.028 | 1.668 | 1.313 | 1.975 | 0.43%  |

|                                |       |       |       |       |       |       |        |
|--------------------------------|-------|-------|-------|-------|-------|-------|--------|
| Montenegro                     | 6.665 | 5.937 | 7.930 | 7.312 | 6.432 | 8.398 | 0.34%  |
| Serbia                         | 3.035 | 2.619 | 3.586 | 4.026 | 3.189 | 4.560 | 1.05%  |
| Bosnia and Herzegovina         | 2.543 | 2.150 | 3.052 | 3.128 | 2.457 | 3.528 | 0.77%  |
| Albania                        | 0.999 | 0.887 | 1.202 | 1.070 | 0.855 | 1.315 | 0.26%  |
| Papua New Guinea               | 4.712 | 3.238 | 6.592 | 4.191 | 3.055 | 5.556 | -0.43% |
| Vanuatu                        | 4.406 | 3.189 | 5.779 | 4.098 | 2.885 | 5.950 | -0.27% |
| Solomon Islands                | 2.915 | 2.146 | 3.959 | 2.502 | 1.907 | 3.199 | -0.57% |
| Fiji                           | 5.983 | 5.126 | 6.916 | 5.755 | 4.979 | 6.564 | -0.14% |
| Marshall Islands               | 5.912 | 3.895 | 7.914 | 5.265 | 3.786 | 6.761 | -0.43% |
| Federated States of Micronesia | 5.150 | 4.039 | 6.408 | 4.125 | 3.410 | 5.017 | -0.82% |
| Kiribati                       | 1.560 | 1.342 | 1.747 | 1.608 | 1.326 | 1.907 | 0.11%  |
| Samoa                          | 3.531 | 2.747 | 4.403 | 3.138 | 2.411 | 3.819 | -0.44% |
| Tonga                          | 2.093 | 1.794 | 2.475 | 1.981 | 1.625 | 2.372 | -0.20% |
| American Samoa                 | 4.016 | 3.406 | 4.612 | 2.424 | 2.116 | 2.852 | -1.87% |
| Egypt                          | 1.120 | 0.737 | 2.026 | 1.444 | 0.876 | 2.320 | 0.94%  |
| Sudan                          | 0.989 | 0.630 | 1.632 | 1.103 | 0.724 | 1.706 | 0.41%  |
| India                          | 1.582 | 1.229 | 2.168 | 1.824 | 1.507 | 2.170 | 0.53%  |
| Pakistan                       | 2.360 | 1.848 | 3.093 | 3.240 | 2.482 | 4.160 | 1.17%  |
| China                          | 0.984 | 0.781 | 1.175 | 0.877 | 0.791 | 0.971 | -0.43% |

Table presents annualized rate of change (ARC%) among all the GBD low- and middle- income countries, based on the 2018 world bank evaluation.

Estimates for high income countries are not presented in this table and can be found in the GBD visualization tool <http://vizhub.healthdata.org/gbd-compare>
